# Supplementary material
Source: Springer Nature journal article supplement (https://www.springermedizin.de/resource/supplementary/13019_2007_128_MOESM5_ESM.pdf/9637906)

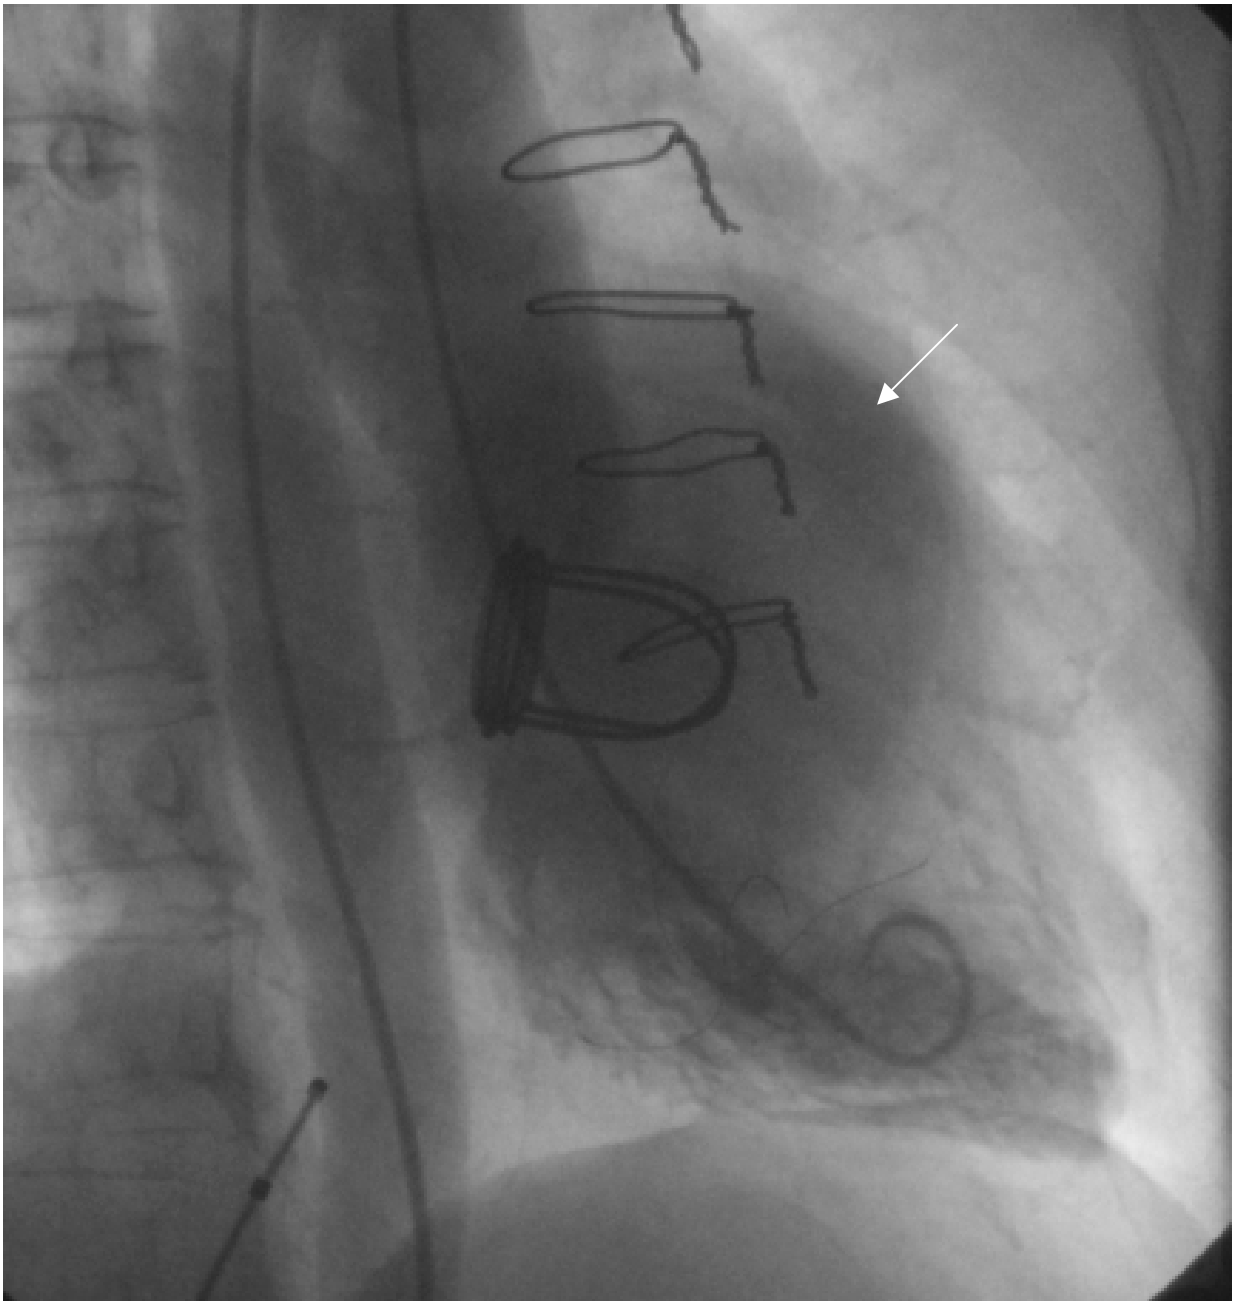

Supplement: MOESM5 [file 9637906]
